# Supplementary material
Source: MDPI journal article supplement (https://www.mdpi.com/2813-3307/1/2/13)
Supplement: s1 [file s1]

Archive with 1 entries (1 files):
- lymphatics-2487155-supplementary.pdf
